# Supplementary material for: Parvimonas micra forms a distinct bacterial network with oral pathobionts in colorectal cancer patients
Source: PubMed Central journal article supplement (PMC11487773; doi:10.1186/s12967-024-05720-8), 2024-10-17
Supplement: 12967_2024_5720_MOESM2_ESM.pdf [file 12967_2024_5720_MOESM2_ESM.pdf]

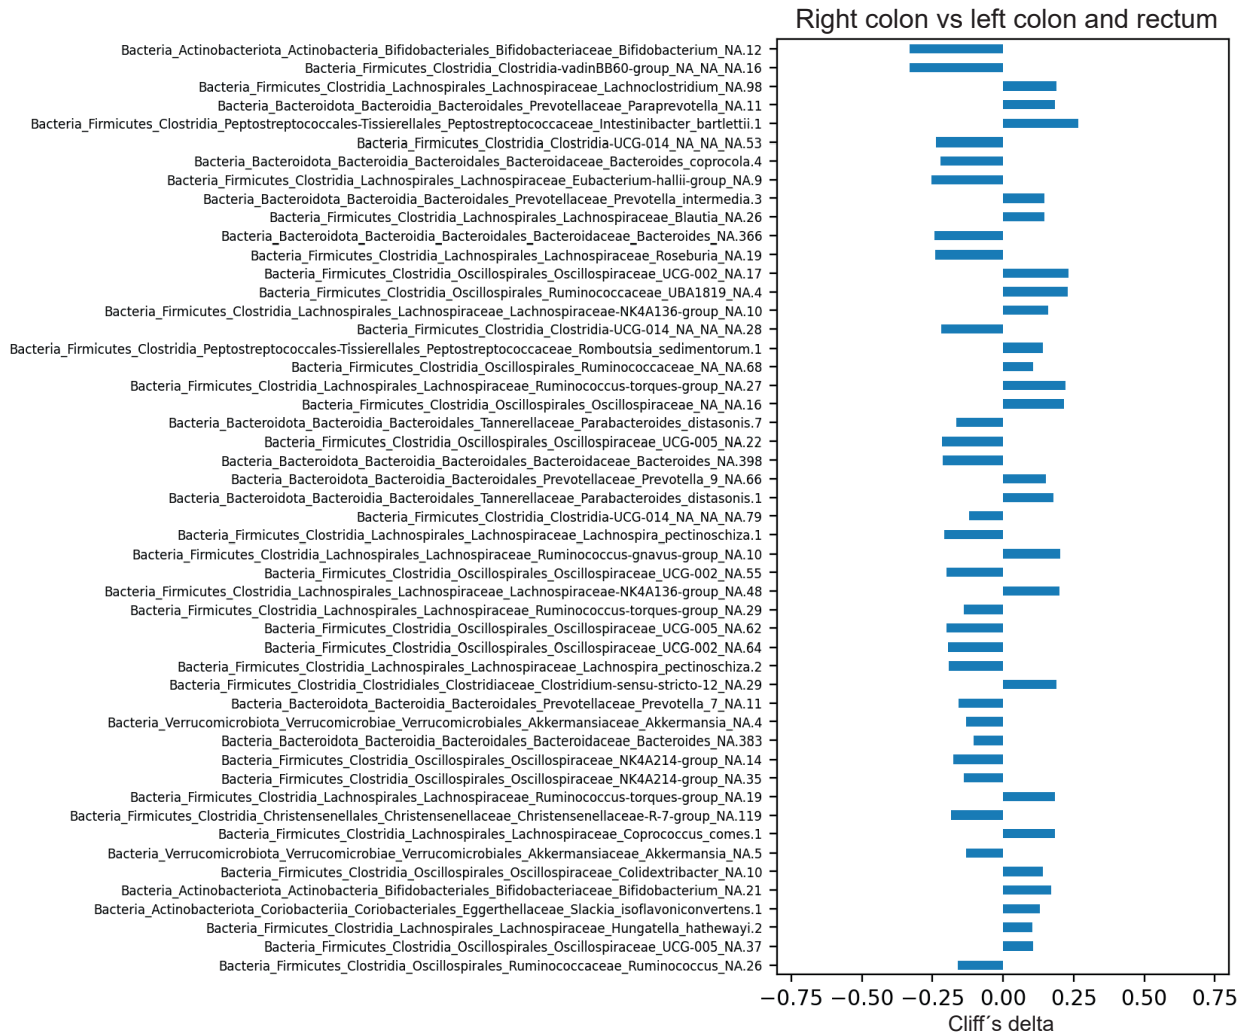

**Figure S2.** Top ASVs with the most significant differences in abundance between right colon vs left colon and rectum as determined by the MWU test. ASVs were sorted according to p-value, displaying the ASV with the lowest p-value at the top (nominal p-values were used). A negative Cliff's delta indicates higher abundance in right-sided tumours, whereas a positive Cliff's delta indicates a higher abundance in left-sided and rectal tumours.
